# Supplementary material for: Physical Impact of SARS-CoV-2 Infection in a Population of Italian Healthcare Workers
Source: MDPI journal article supplement (doi:10.3390/ijerph20054506), 2023-03-03
Supplement: s1 [file s1]

| PERSONAL DATA AND EMPLOYMENT CARD |  |            |  |
|-----------------------------------|--|------------|--|
| SURNAME                           |  | FIRST NAME |  |
| REGISTER                          |  | TYPE       |  |
| MOBILE PHONE                      |  | E-MAIL     |  |
| TASK                              |  | DEPARTMENT |  |

| SARS-CoV-2 RT-PCR |  |        |  |
|-------------------|--|--------|--|
| DATE              |  | RESULT |  |
| RT-PCR            |  |        |  |

| ACTIVE SURVEILLANCE                   |  |
|---------------------------------------|--|
| CLASSIFIED                            |  |
| INDEX FROM RISK MdL (self classified) |  |
| CONTACTS OUTSIDE WORK                 |  |

| CoViD-19 COURSE             |  |              |  |
|-----------------------------|--|--------------|--|
| HOSPITALIZATION             |  |              |  |
| FEVER                       |  | ANOSMY       |  |
| COUGH                       |  | AGEUSIA      |  |
| DYSPNEA                     |  | CONFUSION    |  |
| ASTHENIA                    |  | VOMIT        |  |
| headache                    |  | DIARRHEA     |  |
| CONJUNCTIVITIS              |  | ASYMPTOMATIC |  |
| PAINS OSTEO-MUSCLE-ARTICLES |  | OTHER        |  |
| DURATION POSITIVITY         |  |              |  |
| NOTE / THERAPY              |  |              |  |

| POST CoViD-19  |  |                           |  |
|----------------|--|---------------------------|--|
| ASYMPTOMATIC   |  | ANOSMY                    |  |
| COUGH          |  | AGEUSIA                   |  |
| DYSPNEA        |  | CONFUSION                 |  |
| ASTHENIA       |  | CONJUNCTIVITIS            |  |
| headache       |  | OSTEUM PAIN-MUSCLE-JOINTS |  |
| NOTE / THERAPY |  |                           |  |

| REMOTE PATHOLOGICAL HISTORY |  |  |
|-----------------------------|--|--|
| m. CARDIOVASCULAR           |  |  |
| m. PNEUMOLOGICAL            |  |  |
| m. NEUROLOGICAL             |  |  |
| m. PSYCHIATRIC              |  |  |
| DIABETES                    |  |  |
| OTHER                       |  |  |
| FRAGILITY                   |  |  |

| PHARMACOLOGICAL HISTORY    |  |
|----------------------------|--|
| CHRONIC HERAPIES<br>IN ACT |  |
| NOTE                       |  |

| OBJECTIVE EXAMINATION |  |            |  |
|-----------------------|--|------------|--|
| WEIGHT                |  | HEIGHT     |  |
| PA ( mmHg )           |  | FC ( bpm ) |  |
| CARDIOVASCULAR        |  |            |  |
| PNEUMOLOGICAL         |  |            |  |
| NEUROLOGICAL          |  |            |  |
| PSYCHIATRIC           |  |            |  |
| OTHER                 |  |            |  |

| FOLLOW UP       |                                            |                                            |                                       |                                        |
|-----------------|--------------------------------------------|--------------------------------------------|---------------------------------------|----------------------------------------|
|                 | DATE                                       | IgG                                        | Value                                 | IgM                                    |
| SEROLOGY        |                                            |                                            |                                       |                                        |
| SEROLOGY        |                                            |                                            |                                       |                                        |
| SEROLOGY        |                                            |                                            |                                       |                                        |
| TAKEN IN CHARGE | <input type="checkbox"/> CARDIOLOGICA<br>L | <input type="checkbox"/> PNEUMOLOGICA<br>L | <input type="checkbox"/> NEUROLOGICAL | <input type="checkbox"/> PSYCHOLOGICAL |
| OTHER           |                                            |                                            |                                       |                                        |

Medical Specialist in Training

☐

Occupational Medical Director

---

---

## IES-6 Stairs

- |                                                                                                                           |  |
|---------------------------------------------------------------------------------------------------------------------------|--|
| 1. Since the beginning of the emergency, many things have made me think about COVID-19                                    |  |
| 2. Since the beginning of the COVID-19 emergency, I have been thinking about it even without wanting to                   |  |
| 3. Since the beginning of the COVID-19 emergency, I have been feeling nervous and alarmed                                 |  |
| 4. Since the beginning of the COVID-19 emergency, I try not to think about it                                             |  |
| 5. Since the beginning of the COVID-19 emergency, I realize that I still have many negative emotions without realizing it |  |
| 6. Since the start of the COVID-19 emergency, I have had difficulty concentrating                                         |  |

## How scared he was from the risk of

- |                                                |  |
|------------------------------------------------|--|
| 1. Getting infected with SARS-CoV-2 / CoViD-19 |  |
| 2. Being quarantined                           |  |
| 3. Aggravate existing diseases                 |  |
| 4. Infecting family members                    |  |

|          |             |          |         |          |        |          |              |          |           |
|----------|-------------|----------|---------|----------|--------|----------|--------------|----------|-----------|
| <b>1</b> | For Nothing | <b>2</b> | In Part | <b>3</b> | Enough | <b>4</b> | In Good Part | <b>5</b> | Extremely |
|----------|-------------|----------|---------|----------|--------|----------|--------------|----------|-----------|
