# Supplementary material for: Physical Impact of SARS-CoV-2 Infection in a Population of Italian Healthcare Workers
Source: MDPI journal article supplement (doi:10.3390/ijerph20054506), 2023-03-03
Supplement: s1 [file s1]

## Supplementary Material Tables

**Table S1.** Baseline characteristics of the sample and according to sex and age.

|                                                             | Total sample<br>(n,%) | Age (mean $\pm$ sd) | P value                                                                                           | Male (n,%) | Female (n,<br>%) | P value  |
|-------------------------------------------------------------|-----------------------|---------------------|---------------------------------------------------------------------------------------------------|------------|------------------|----------|
| <b>Age (mean <math>\pm</math>sd)</b>                        | 45,1 ( $\pm$ 11,9)    | --                  | --                                                                                                | --         | --               | --       |
| Sex                                                         |                       |                     | 0.108                                                                                             |            |                  | --       |
| Male                                                        | 106 (32,8),           | 43,5 (12,6)         |                                                                                                   | --         | --               |          |
| Female                                                      | 212 (66,7)            | 45,8 (11,5)         |                                                                                                   | --         | --               |          |
| <b>Completely fit to work</b>                               |                       |                     | <.001***                                                                                          |            |                  | 0.047*   |
| Yes                                                         | 273 (85,8)            | 43,8 (7,5)          |                                                                                                   | 96 (92,3)  | 177 (84,3)       |          |
| Limitations in work activities                              | 41 (13,1)             | 54,3 (11,8)         |                                                                                                   | 8 (7,7)    | 33 (15,7)        |          |
| <b>Manual handling limitations</b>                          |                       |                     | <.001***                                                                                          |            |                  | 0.002**  |
| Yes                                                         | 29 (9,2)              | 53,1 (7,7)          |                                                                                                   | 2 (1,2)    | 27 (12,9)        |          |
| No                                                          | 285 (90,8)            | 44,4 (12)           |                                                                                                   | 102 (98,1) | 183 (87,1)       |          |
| <b>Night shifts limitations</b>                             |                       |                     | 0.002**                                                                                           |            |                  | 0.676    |
| Yes                                                         | 13 (4,1)              | 55,3 (6,7)          |                                                                                                   | 5 (4,8)    | 8 (3,8)          |          |
| No                                                          | 301 (95,9)            | 44,7 (11,9)         |                                                                                                   | 99 (95,2)  | 202 (96,2)       |          |
| <b>Type of job</b>                                          |                       |                     | <.001***                                                                                          |            |                  | <.001*** |
| Nurse                                                       | 142 (44,7)            | 44,0 (11,1)         | N-HC.Ass***,<br>N-Oth***, N-MD*, N-Res.MD***,<br>HC.Ass-Res.MD***,<br>Oth.-Res.MD***,MD-Res.MD*** | 39 (27,5)  | 103 (72,5) †     |          |
| Healthcare assistants                                       | 68 (21,4)             | 49,8 (9,0)          |                                                                                                   | 15 (22,1)  | 53 (77,9) †      |          |
| Other                                                       | 34 (10,7)             | 52,6 (9,7)          |                                                                                                   | 12 (35,3)  | 22 (64,7)        |          |
| Physician                                                   | 37 (11,6)             | 49,2 (12,4)         |                                                                                                   | 21 (56,7)  | 16 (43,2) †      |          |
| Resident physicians                                         | 37 (11,6)             | 29,4 (2,4)          |                                                                                                   | 19 (51,4)  | 18 (48,6) †      |          |
| <b>Frontline workers (COVID ward, emergency department)</b> |                       |                     | 0.03*                                                                                             |            |                  | 0.323    |
| Yes                                                         | 37 (11,6)             | 41,4 (10,3)         |                                                                                                   | 15 (14,2)  | 22 (10,4)        |          |
| No                                                          | 281 (88,4)            | 45,6 (12,1)         |                                                                                                   | 91 (85,8)  | 190 (89,6)       |          |
| <b>Pre-existing cardiovascular disease</b>                  |                       |                     | <.001***                                                                                          |            |                  | 0.088    |
| Yes                                                         | 45 (14,2)             | 55,3 (8,9)          |                                                                                                   | 20 (18,9)  | 25 (11,8)        |          |
| No                                                          | 273 (85,8),           | 43,4 (11,5)         |                                                                                                   | 86 (81,1)  | 187 (88,2)       |          |
| <b>Pre-existing pneumological disease</b>                   |                       |                     | 0.691                                                                                             |            |                  | 0.111    |
| Yes                                                         | 26 (8,2)              | 46 (12,5)           |                                                                                                   | 5 (4,7)    | 21 (9,9)         |          |
| No                                                          | 292 (91,8)            | 45 (11,9)           |                                                                                                   | 101 (95,3) | 191 (90,1)       |          |
| <b>Pre-existing neurological disease</b>                    |                       |                     | 0.564                                                                                             |            |                  | 0.151    |
| Yes                                                         | 9 (2,8)               | 43,3 (9,7)          |                                                                                                   | 1 (0,9)    | 8 (3,8)          |          |
| No                                                          | 309 (97,2)            | 45 (12)             |                                                                                                   | 105 (99)   | 204 (96,2)       |          |

|                                          |              |             |                                               |            |              |
|------------------------------------------|--------------|-------------|-----------------------------------------------|------------|--------------|
| <b>Pre-existing psychiatric disorder</b> |              |             | 0.207                                         |            | 0.382        |
| Yes                                      | 6 (1,9)      | 51,2 (7,5)  |                                               | 1 (0,9)    | 5 (2,4)      |
| No                                       | 312 (98,1)   | 44,9 (12)   |                                               | 105 (99)   | 207 (97,6)   |
| <b>Diabetes</b>                          |              |             | <.001***                                      |            | 0.317        |
| Yes                                      | yes 13 (4,1) | 58,2 (4,3)  |                                               | 6 (5,7)    | 7 (3,3)      |
| No                                       | 305 (95,9)   | 44,5 (11,8) |                                               | 100 (94,3) | 205 (96,7)   |
| <b>Endocrinological disorder</b>         |              |             | <.001***                                      |            | 0.001**      |
| Yes                                      | 30 (9,4)     | 53,5 (8,8)  |                                               | 2 (1,9)    | 28 (13,2)    |
| No                                       | 288 (90,6)   | 44,2 (12)   |                                               | 104 (98,1) | 184 (86,8)   |
| <b>Other health issues</b>               |              |             | <.001***                                      |            | 0.169        |
| Yes                                      | 65 (20,4)    | 50,3 (11)   |                                               | 17 (16)    | 48 (22,6)    |
| No                                       | 253 (79,6)   | 43,7 (11,8) |                                               | 89 (84)    | 164 (77,4)   |
| <b>Number of drugs taken daily</b>       |              |             | <.001***                                      |            | 0.119        |
| 0 drugs                                  | 202 (63,7)   | 42,3 (11,3) | 0-≤2***, 0-≥3***, ≤2-≥3**                     | 74 (69,8)  | 128 (60,7)   |
| ≤2 drugs                                 | 89 (28,1)    | 48 (11,7)   |                                               | 22 (20,8)  | 67 (31,8)    |
| ≥3 drugs                                 | 26 (8,2)     | 55,9 (9,2)  |                                               | 10 (9,4)   | 16 (7,6)     |
| <b>BMI</b>                               |              |             | <.001***                                      |            | 0.003**      |
| Underweight                              | 7 (2,2)      | 37,7 (10,3) | Under-obesity*, normal-over*, normal-obesity* | 0          | 7 (3,3)      |
| Normal weight                            | 210 (66,3)   | 43,5 (11,9) |                                               | 62 (58,5)  | 148 (70,1) † |
| Overweight                               | 65 (20,5)    | 48,1 (10,7) |                                               | 33 (31,1)  | 32 (15,2) †  |
| Obesity                                  | 35 (11,0)    | 50,3 (12,3) |                                               | 11 (10,4)  | 24 (11,4)    |
| <b>Previous full vaccination</b>         |              |             | 0.964                                         |            | 0.082        |
| Yes                                      | 31 (9,7)     | 45,2 (10,9) |                                               | 6 (5,7)    | 25 (11,8)    |
| No                                       | 287 (90,3)   | 45,1 (12,1) |                                               | 100 (94,3) | 187 (88,2)   |

\*Significant results are indicated with \*. \*p<0.05, \*\* p < 0.01, \*\*\* p < 0.001; † Significant difference between observed and expected frequency at post hoc analysis.

**Table S2.** Main clinical characteristics of the acute infection for the whole sample and according to sex and age. Analysing the characteristics of acute infection there was no difference in the mean age for acute, except for dyspnoea (p=0.012) and diarrhoea (p=0.014) who appeared in patients with a higher mean age. Mean age in hospitalized patients and who used medications, except for NSAIDs, was higher (respectively p=0.020 and p<.001) too. This may be due to a more severe illness that required use of specific drugs. Non relevant differences were found between male and females for the clinical characteristics of the acute illness, apart from dyspnoea which occurred more often in women (0.012). Also, female workers tended to report more other disturbs (p<.001).

| <b>Acute infection features</b> |                     |                       |                |                   |                     |                |
|---------------------------------|---------------------|-----------------------|----------------|-------------------|---------------------|----------------|
|                                 | <b>Total sample</b> | <b>Age (mean ±sd)</b> | <b>P value</b> | <b>Male (n,%)</b> | <b>Female (n,%)</b> | <b>P value</b> |
| <b>Antibiotics</b>              |                     |                       | <.001***       |                   |                     | 0.899          |
| Yes                             | 49 (15,5)           | 50,9 (11,3)           |                | 16 (15,1)         | 33 (15,6)           |                |
| No                              | 268 (84,5)          | 44 (11,8)             |                | 90 (84,9)         | 178 (84,4)          |                |
| <b>Antipyretics/NSAIDs</b>      |                     |                       | 0.929          |                   |                     | 0.203          |
| Yes                             | 231 (72,9)          | 45,1 (11,7)           |                | 24 (22,6)         | 62 (29,4)           |                |
| No                              | 86 (27,1)           | 45 (12,1)             |                | 82 (77,4)         | 149 (70,6)          |                |
| <b>Corticosteroids</b>          |                     |                       | <.001***       |                   |                     | 0.868          |

|                                              |            |             |          |            |            |          |
|----------------------------------------------|------------|-------------|----------|------------|------------|----------|
| Yes                                          | 73 (23,0)  | 49,7 (11,1) |          | 25 (23,6)  | 48 (22,7)  |          |
| No                                           | 244 (77,0) | 43,7 (11,9) |          | 81 (76,4)  | 163 (77,3) |          |
| <b>LMW heparin</b>                           |            |             | 0.090    |            |            | 0.492    |
| Yes                                          | 42 (13,2)  | 48 (11,3)   |          | 16 (15,1)  | 26 (12,3)  |          |
| No                                           | 275 (86,8) | 44,6 (12)   |          | 90 (84,9)  | 185 (87,7) |          |
| <b>Use of medication (except for NSAIDs)</b> |            |             | <.001*** |            |            | 0.709    |
| Yes                                          |            | 48,7 (11,4) |          | 30 (28,3)  | 64 (30,3)  |          |
| No                                           |            | 43,5 (11,9) |          | 76 (71,7)  | 147 (69,7) |          |
| <b>Hospitalization</b>                       |            |             | 0.020*   |            |            | 0.069    |
| Yes                                          | 10 (3,1)   | 53,7 (10,8) |          | 6 (5,7)    | 4 (1,9)    |          |
| No                                           | 308 (96,9) | 44,8 (11,9) |          | 100 (94,3) | 208 (98,1) |          |
| <b>Other symptoms</b>                        |            |             | 0.215    |            |            | <.001*** |
| Yes                                          | 65 (20,4)  | 46,7 (11,9) |          | 10 (9,4)   | 55 (25,9)  |          |
| No                                           | 253 (79,6) | 44,6 (11,9) |          | 96 (90,6)  | 157 (74,1) |          |
| <b>Fever</b>                                 |            |             | 0.653    |            |            | 0.340    |
| Yes                                          | 147 (46,2) | 45,4 (11,5) |          | 53 (50)    | 94 (44,3)  |          |
| No                                           | 171 (53,8) | 44,8 (12,3) |          | 53 (50)    | 118 (55,7) |          |
| <b>Cough</b>                                 |            |             | 0.537    |            |            | 0.682    |
| Yes                                          | 119 (37,4) | 45,6 (12)   |          | 38 (35,8)  | 81 (38,2)  |          |
| No                                           | 199 (62,6) | 44,7 (11,9) |          | 68 (64,2)  | 131 (61,8) |          |
| <b>Dyspnea</b>                               |            |             | 0.012*   |            |            | 0.027*   |
| Yes                                          | 78 (24,5)  | 48 (11,8)   |          | 18 (17)    | 60 (28,3)  |          |
| No                                           | 240 (75,5) | 44,1 (11,8) |          | 88 (83)    | 152 (71,7) |          |
| <b>Fatigue</b>                               |            |             | 0.504    |            |            | 0.129    |
| Yes                                          | 178 (56)   | 45,5 (12)   |          | 53 (50)    | 125 (59)   |          |
| No                                           | 140 (44)   | 44,6 (11,9) |          | 53 (50)    | 87 (41)    |          |
| <b>Headache</b>                              |            |             | 0.675    |            |            | 0.367    |
| Yes                                          | 119 (37,4) | 44,7 (11,7) |          | 36 (34)    | 83 (39,2)  |          |
| No                                           | 199 (62,6) | 45,3 (12,1) |          | 70 (66)    | 129 (60,8) |          |
| <b>Conjunctivitis</b>                        |            |             | 0.504    |            |            | 0.247    |
| Yes                                          | 26 (8,2)   | 47 (12,1)   |          | 6 (5,7)    | 20 (9,4)   |          |
| No                                           | 292 (91,8) | 44,9 (12,1) |          | 100 (94,3) | 192 (90,6) |          |
| <b>Musculoskeletal pain</b>                  |            |             | 0.869    |            |            | 0.578    |
| Yes                                          | 166 (52,2) | 45,2 (11,7) |          | 53 (50)    | 113 (53,3) |          |
| No                                           | 152 (47,8) | 45 (12,2)   |          | 53 (50)    | 99 (46,7)  |          |
| <b>Alteration in smell</b>                   |            |             | 0.871    |            |            | 0.874    |
| Yes                                          | 148 (46,4) | 45 (12)     |          | 50 (47,2)  | 98 (46,2)  |          |
| No                                           | 170 (53,6) | 45,2 (12)   |          | 56 (52,8)  | 114 (53,8) |          |
| <b>Alteration in taste</b>                   |            |             | 0.985    |            |            | 0.420    |
| Yes                                          | 130 (40,9) | 45,1 (11,8) |          | 40 (37,7)  | 90 (42,5)  |          |
| No                                           | 188 (59,1) | 45,1 (12,1) |          | 66 (62,3)  | 122 (57,5) |          |
| <b>Dizziness</b>                             |            |             | 0.274    |            |            | 0.414    |
| Yes                                          | 20 (6,3)   | 47,9 (10,6) |          | 5 (4,7)    | 15 (7,1)   |          |
| No                                           | 298 (93,7) | 44,9 (12)   |          | 101 (95,3) | 197 (92,9) |          |
| <b>Nausea and vomit</b>                      |            |             | 0.194    |            |            | 0.061    |
| Yes                                          | 12 (3,8)   | 49,8 (8)    |          | 1 (0,9)    | 11 (5,2)   |          |
| No                                           | 306 (96,2) | 44,9 (12)   |          | 105 (99,1) | 201 (94,8) |          |
| <b>Diarrhea</b>                              |            |             | 0.014*   |            |            | 0.765    |
| Yes                                          | 63 (19,8)  | 48,4 (11,2) |          | 20 (18,9)  | 43 (20,3)  |          |
| No                                           | 255 (80,2) | 44,3 (12)   |          | 86 (81,1)  | 169 (79,7) |          |
| <b>Asymptomatic</b>                          |            |             | 0.265    |            |            | 0.146    |
| Yes                                          | 47 (14,8)  | 43,3 (12,7) |          | 20 (18,9)  | 27 (12,7)  |          |
| No                                           | 271 (85,2) | 45,4 (11,8) |          | 86 (81,1)  | 185 (87,3) |          |

|                                                    |                     |                        |                |                                       |                                         |                |
|----------------------------------------------------|---------------------|------------------------|----------------|---------------------------------------|-----------------------------------------|----------------|
| <b>Length of COVID infection (swab positivity)</b> |                     |                        | 0.457          |                                       |                                         | 0.570          |
| <14 days                                           | 42 (13,2)           | 42,9 (11,4)            |                | 12 (11,3)                             | 30 (14,1)                               |                |
| 14-21 days                                         | 60 (18,9)           | 45,6 (11,7)            |                | 23 (21,7)                             | 37 (17,5)                               |                |
| >21 days                                           | 216 (67,9)          | 45,3 (12,1)            |                | 71 (67)                               | 145 (68,4)                              |                |
|                                                    | <b>Total sample</b> | <b>Kendall's tau b</b> | <b>P value</b> | <b>Male (mean <math>\pm</math>sd)</b> | <b>Female (mean <math>\pm</math>sd)</b> | <b>P value</b> |
| <b>Number of acute symptoms</b>                    | 4 (2,8)             | 0.057 (Kendall)        | 0.151          | 3,6 (2,7)                             | 4,2 (2,8)                               | 0.082          |

Significant results are indicated with \*. \* $p < 0.05$ , \*\*  $p < 0.01$ , \*\*\*  $p < 0.001$ .

**Table S3.** Associations between any post-COVID symptom, post-COVID dyspnoea, post-COVID fatigue, post-COVID musculoskeletal pain and baseline and acute disease's characteristics of the sample.

|                                            | <b>Any post-COVID symptom (n=182)</b> | <b>p</b> | <b>Post-COVID dyspnea (n=42)</b> | <b>p</b> | <b>Post-COVID Fatigue (n=102)</b> | <b>p</b> | <b>Post-COVID Musculoskeletal Pain (n=43)</b> | <b>p</b> |
|--------------------------------------------|---------------------------------------|----------|----------------------------------|----------|-----------------------------------|----------|-----------------------------------------------|----------|
| <b>Pre-existing cardiovascular disease</b> |                                       | 0.686    |                                  | 0.146    |                                   | 0.881    |                                               | 0.368    |
| Yes                                        | 27 (60)                               |          | 9 (20)                           |          | 14 (31,1)                         |          | 8 (17,8)                                      |          |
| No                                         | 155 (56,8)                            |          | 33 (12,1)                        |          | 88 (32,2)                         |          | 35 (12,8)                                     |          |
| <b>Pre-existing neurological disease</b>   |                                       | 0.431    |                                  | 0.418    |                                   | 0.521    |                                               | 0.229    |
| Yes                                        | 4 (44,4)                              |          | 2 (22,2)                         |          | 2 (22,2)                          |          | 0 (0)                                         |          |
| No                                         | 178 (57,6)                            |          | 40 (12,9)                        |          | 100 (32,3)                        |          | 43 (13,9)                                     |          |
| <b>Diabetes</b>                            |                                       | 0.372    |                                  | 0.056    |                                   | 0,267    |                                               | 0.841    |
| Yes                                        | 9 (69,2)                              |          | 4 (30,8)                         |          | 6 (46,2)                          |          | 2 (15,4)                                      |          |
| No                                         | 173 (56,7)                            |          | 38 (12,5)                        |          | 96 (31,5)                         |          | 41 (13,4)                                     |          |
| <b>Endocrinological disorder</b>           |                                       | 0.478    |                                  | 0.557    |                                   | 0.329    |                                               | 0.597    |
| Yes                                        | 19 (63,3)                             |          | 5 (16,7)                         |          | 12 (40)                           |          | 5 (16,7)                                      |          |
| No                                         | 163 (56,6)                            |          | 37 (12,8)                        |          | 90 (31,3)                         |          | 38 (13,2)                                     |          |
| <b>Previous full vaccination</b>           |                                       | 0.153    |                                  | 0.084    |                                   | 0.702    |                                               | 0.510    |

|                                                    |               |         |              |         |              |         |           |         |
|----------------------------------------------------|---------------|---------|--------------|---------|--------------|---------|-----------|---------|
| Yes                                                | 14<br>(45,2)  |         | 1 (3,2)      |         | 9 (29)       |         | 3 (9,7)   |         |
| No                                                 | 168<br>(58,5) |         | 41<br>(14,3) |         | 93<br>(32,4) |         | 40 (13,9) |         |
| <b>Length of COVID infection (swab positivity)</b> |               | 0.221   |              | 0,150   |              | 0,035   |           | 0,412   |
| <14 days                                           | 19 (45)       |         | 3 (7,1)      |         | 11<br>(26,2) |         | 3 (7,1)   |         |
| 14-21 days                                         | 34<br>(56,7)  |         | 5 (8,3)      |         | 12 (20)      |         | 8 (13,3)  |         |
| >21 days                                           | 129<br>(59,7) |         | 34<br>(15,7) |         | 79<br>(36,6) |         | 32 (14,8) |         |
| <b>Hospitalization</b>                             |               | 0.033*  |              | <,001** |              | <,001** |           | 0,013*  |
| Yes                                                | 9 (90)        |         | 7 (70)       |         | 8 (80)       |         | 4 (40)    |         |
| No                                                 | 173<br>(56,2) |         | 35<br>(11,4) |         | 94<br>(30,5) |         | 39 (12,7) |         |
| <b>Fever</b>                                       |               | <.001** |              | 0.012*  |              | <.001** |           | 0.003** |
| Yes                                                | 100<br>(68,3) |         | 27<br>(18,4) |         | 67<br>(45,6) |         | 29 (19,7) |         |
| No                                                 | 82 (48)       |         | 15<br>(8,8)  |         | 35<br>(20,5) |         | 14 (8,2)  |         |
| <b>Cough</b>                                       |               | <.001** |              | 0.001** |              | <.001** |           | 0.324   |
| Yes                                                | 91<br>(76,5)  |         | 25 (21)      |         | 54(45,4)     |         | 19 (16)   |         |
| No                                                 | 91<br>(45,3)  |         | 17<br>(8,5)  |         | 48<br>(24,1) |         | 24 (12,1) |         |
| <b>Headache</b>                                    |               | <.001** |              | 0.005** |              | <.001** |           | <.001** |
| Yes                                                | 86<br>(72,3)  |         | 24<br>(20,2) |         | 58<br>(48,7) |         | 27 (22,7) |         |
| No                                                 | 96<br>(48,2)  |         | 18 (9)       |         | 44<br>(22,1) |         | 16 (8)    |         |
| <b>Alteration in smell</b>                         |               | <.001** |              | 0.013*  |              | 0.005** |           | 0.049*  |
| Yes                                                | 108 (73)      |         | 27<br>(18,2) |         | 59 (40)      |         | 26 (17,6) |         |
| No                                                 | 74<br>(43,5)  |         | 15<br>(8,8)  |         | 43<br>(25,3) |         | 17 (10)   |         |
| <b>Alteration in taste</b>                         |               | <.001** |              | 0.008** |              | 0.003** |           | 0.032*  |
| Yes                                                | 95<br>(73,1)  |         | 25<br>(19,2) |         | 54<br>(41,5) |         | 24 (18,5) |         |
| No                                                 | 87<br>(46,2)  |         | 17 (9)       |         | 48<br>(25,5) |         | 19 (10,1) |         |
| <b>Dizziness</b>                                   |               | 0.097   |              | 0.022*  |              | 0.006** |           | 0.004** |
| Yes                                                | 15 (75)       |         | 6 (30)       |         | 12 (60)      |         | 7 (35)    |         |
| No                                                 | 167 (56)      |         | 36<br>(12,1) |         | 90<br>(30,2) |         | 36 (12,1) |         |

|                         |               |              |              |         |              |              |           |         |
|-------------------------|---------------|--------------|--------------|---------|--------------|--------------|-----------|---------|
| <b>Nausea and vomit</b> |               | 0.014*       |              | 0.718   |              | 0.047*       |           | 0.041*  |
| Yes                     | 11<br>(91,7)  |              | 2<br>(16,7)  |         | 7<br>(58,3)  |              | 4 (33,3)  |         |
| No                      | 171<br>(55,9) |              | 40<br>(13,1) |         | 95 (31)      |              | 39 (12,7) |         |
| <b>Diarrhea</b>         |               | <.001*<br>** |              | 0.266   |              | <.001*<br>** |           | 0.002** |
| Yes                     | 50<br>(79,4)  |              | 11<br>(17,5) |         | 32<br>(50,8) |              | 16 (25,4) |         |
| No                      | 132<br>(51,8) |              | 31<br>(12,2) |         | 70<br>(27,5) |              | 27 (10,6) |         |
| <b>Other symptoms</b>   |               | <.001*<br>** |              | 0.002** |              | 0.348        |           | 0.034*  |
| Yes                     | 50<br>(76,9)  |              | 16<br>(24,6) |         | 24<br>(36,9) |              | 14 (21,5) |         |
| No                      | 132<br>(52,2) |              | 26<br>(10,3) |         | 78<br>(30,8) |              | 29 (11,5) |         |

## Paragraph S4

### Multiple Logistic regression

#### 3.3.1. a) Any post-COVID symptom

The results showed that the first model including age, the presence of dyspnoea, fatigue and musculoskeletal pain in the acute phase of infection was significant ( $\chi^2(4)=84,3$ ,  $p<0.001$ ), with a Nagelkerke R-squared of .318 and a non-significant Hosmer-Lemeshow test ( $p=0,236$ ). In this model dyspnoea ( $\text{Exp(B)}=5,48$ , 95% CI=2,5-11,9,  $p<.001$ ) and fatigue ( $\text{Exp(B)}=3,73$ , 95% CI=2,16-6,47,  $p<.001$ ) in the acute illness were statistically associated with the presence of any post-COVID symptom. The second model showed significant improvement from the first block ( $\chi^2(6)=91,52$ ,  $p<0.001$ ), with a Nagelkerke R-squared of .341 and a non-significant Hosmer-Lemeshow test ( $\chi^2(8)=5,1$ ,  $p=0.747$ ). Dyspnoea ( $\text{Exp(B)}=5,16$ , 95% CI=2,4-11,3,  $p<.001$ ), fatigue ( $\text{Exp(B)}=3,86$ , 95% CI=2,2-6,8,  $p<.001$ ) and any limitation in work activities ( $\text{Exp(B)}=2,9$ , 95% CI=1,1-7,3,  $p=0.025$ ) were independently associated with the presence of any post-COVID symptom

#### 3.3.2. b) Dyspnoea

The results showed that the first model including age, number of symptoms and dyspnoea during the acute infection significant ( $\chi^2(3)=67,20$ ,  $p<0.001$ ), with a Nagelkerke R-squared of .354 and a non-significant Hosmer-Lemeshow test ( $p=0,252$ ). In this model dyspnoea ( $p<.001$ ,  $\text{Exp(B)}=12,3$ , 95% CI=4,7-31,8) in the acute illness was statistically associated with the presence of post-COVID dyspnoea. The second model showed significant improvement from the first block ( $\chi^2(5)=86,47$ ,  $p<0.001$ ), with a Nagelkerke R-squared of .442 and a non-significant Hosmer-Lemeshow test ( $\chi^2(8)=1,925$ ,  $p=0.983$ ). Dyspnoea ( $\text{Exp(B)}=13,9$ , 95% CI=4,9-39,5,  $p<.001$ ), pre-existing pneumological diseases ( $\text{Exp(B)}=4,9$ , 95% CI=1,5-15,8  $p<.008$ ) and any limitation in work activities ( $\text{Exp(B)}=4,8$ , 95% CI=1,7-13,5,  $p=0.003$ ) were independently associated with the presence of post-COVID dyspnoea.

#### 3.3.3. Fatigue

The results showed that the first model including age, number of symptoms and fatigue during the acute infection significant ( $\chi^2(3)=74,9$ ,  $p<0.001$ ), with a Nagelkerke R-squared of .297 and a non-significant Hosmer-Lemeshow test ( $p=0,802$ ). In this model age ( $\text{Exp(B)}=1,026$ , 95% CI=1-1,05,  $p=0.025$ ), fatigue in the acute illness ( $\text{Exp(B)}=3,6$ , 95% CI=1,7-7,4,  $p<.001$ ) and the number of acute symptoms ( $\text{Exp(B)}=1,27$ ,

95% CI=1,11-1,4,  $p<0.001$ ) were statistically associated with the presence of post-COVID fatigue. The second model showed significant improvement from the first block ( $\chi^2(5)=84,6$ ,  $p<0.001$ ), with a Nagelkerke R-squared of .330 and a non-significant Hosmer-Lemeshow test ( $\chi^2(8)=10,01$ ,  $p=0.265$ ). Fatigue (Exp(B)=4,0, 95% CI=1,9-8,4,  $p<0.001$ ), number of acute symptoms (Exp(B)=1,23, 95% CI=1,1-1,4,  $p=0.001$ ), any limitation in work activities (Exp(B)=2,3, 95% CI=1,01-5,28,  $p=0.048$ ) were independently associated with the presence of post-COVID fatigue, while being normal weighted at BMI was a protective factor (Exp(B)=0,472, 95% CI=0.27-0.84  $p=0.010$ ). Age was no longer an independent predictor ( $p=0,27$ ).

#### 3.3.4. Musculoskeletal pain

The results showed that the first model including age, number of symptoms and fatigue during the acute infection significant ( $\chi^2(3)=63,3$ ,  $p<0.001$ ), with a Nagelkerke R-squared of .332 and a non-significant Hosmer-Lemeshow test ( $p=0,492$ ). In this model age (Exp(B)=1,1, 95% CI=1,03-1,11,  $p<0.001$ ), musculoskeletal pain in the acute illness (Exp(B)=9,01, 95% CI=2,44-33,3,  $p<0.001$ ) and the number of acute symptoms (Exp(B)=1,25, , 95% CI=1,05-1,47,  $p=0.010$ ) were statistically associated with the presence of post-COVID musculoskeletal disturbs. The second model showed significant improvement from the first block ( $\chi^2(5)=67,7$ ,  $p<0.001$ ), with a Nagelkerke R-squared of .353 and a non-significant Hosmer-Lemeshow test ( $\chi^2(8)=9,76$   $p=0.282$ ). Age (Exp(B)=1,06, 95% CI=1,02-1,1,  $p=0.004$ ), musculoskeletal pain (Expo(B)=8,3, 95% CI=2,23-30,89,  $p=0.002$ , OR) and the number of acute symptoms (Exp(B)=1,22, 95% CI=1,03-1,45,  $p=0.022$ ) remained independently associated with the presence of musculoskeletal disorders during the post-COVID phase, while having a normal BMI and limitations in work activities did not reach the level of significance.
